# Supplementary material
Source: PubMed Central journal article supplement (PMC5540794)
Supplement: NIHMS865766-supplement-1.pdf [file NIHMS865766-supplement-1.pdf]

## Supplementary data

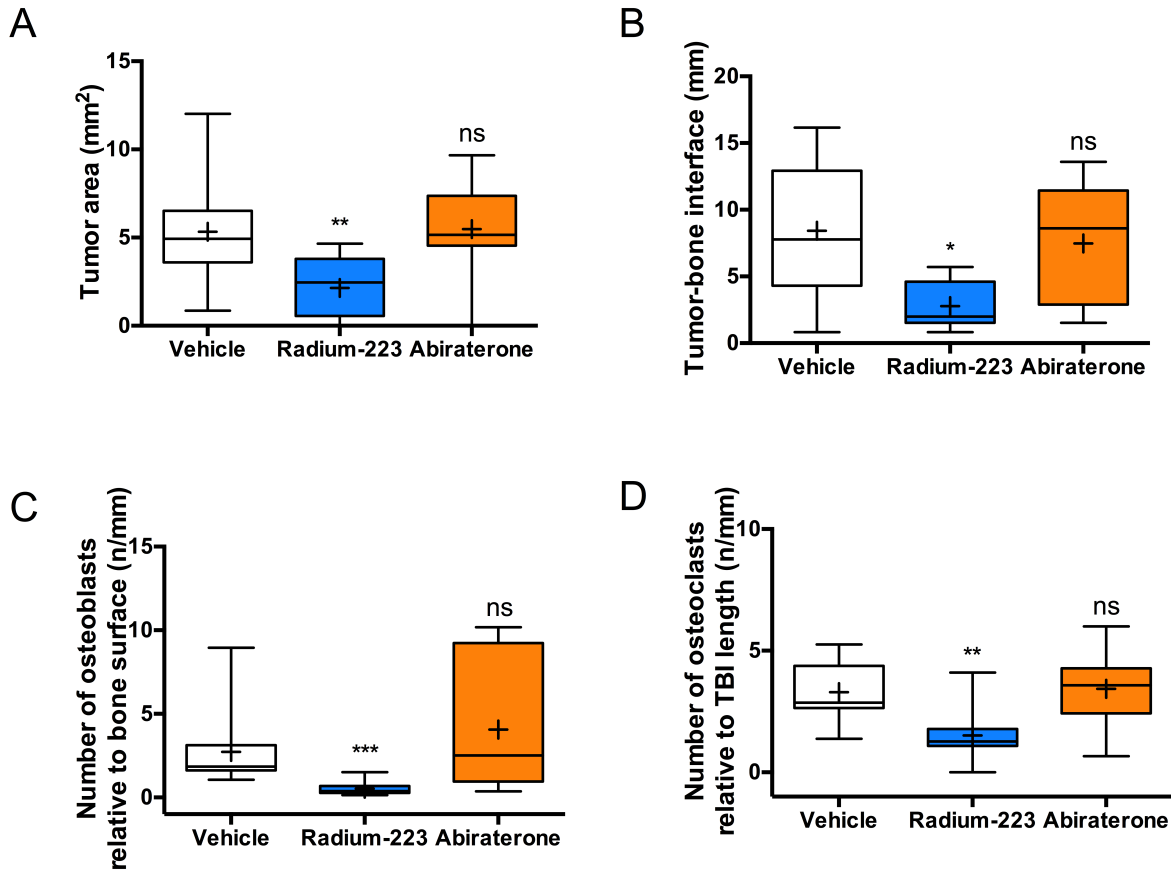

**Supplementary Figure S1. Radium-223 is efficacious in an abiraterone-resistant LuCaP 58 prostate cancer PDX model.** **A**, Tumor area in mice bearing LuCaP 58 tumors ( $n = 11$ ,  $p = 0.00427$  for radium-223,  $p = 0.60632$  for abiraterone). **B**, The length of tumor-bone interface in mice bearing LuCaP 58 tumors ( $n = 8-10$ ,  $p = 0.01554$  for radium-223,  $p = 0.63053$  for abiraterone). **C**, The number of osteoblasts relative to bone surface in mice bearing LuCaP 58 tumors ( $n = 11$ ,  $p = 0.00306$  for radium-223,  $p = 0.85343$  for abiraterone). **D**, The number of osteoclasts relative to TBI in mice bearing LuCaP 58 tumors ( $n = 8-10$ ,  $p = 0.00001$  for radium-223,  $p = 0.79694$  for abiraterone). In box plots, horizontal lines show 5<sup>th</sup>, 25<sup>th</sup>, 50<sup>th</sup>, 75<sup>th</sup> and 95<sup>th</sup> centiles and crosses indicate mean values. ns = not significant, \*  $p < 0.05$ , \*\*  $p < 0.01$ , \*\*\*  $p < 0.001$ .

**Supplementary Table S1.** Characteristics of LNCaP and LuCaP 58 prostate cancer growth in bone models in mice – response to radium-223.

| Parameter                                      | LNCaP<br>300 kBq/kg<br>Q4W, i.v.                | LuCaP 58<br>300 kBq/kg<br>Q4W, i.v. |
|------------------------------------------------|-------------------------------------------------|-------------------------------------|
| <i>Mouse strain</i>                            | NOD.CB17-<br><i>Prkdc<sup>scid</sup>/NcrCrI</i> | SCID                                |
| <i>Tumor-induced bone morphology</i>           | Osteoblastic/mixed                              | Osteoblastic <sup>a</sup> /mixed    |
| <i>Biochemical markers</i>                     |                                                 |                                     |
| PSA                                            | * ↓                                             | ** ↓                                |
| PINP                                           | *** ↓                                           | ** ↓                                |
| <i>Histology</i>                               |                                                 |                                     |
| Tumor area                                     | * ↓                                             | NS                                  |
| Total tissue area                              | *** ↓                                           | ** ↓                                |
| Tumor-bone interface                           | *** ↓                                           | *** ↓                               |
| Total bone area                                | *** ↓                                           | NS                                  |
| Relative trabecular bone area                  | NS                                              | * ↓                                 |
| Number of osteoblasts relative to bone surface | ** ↓                                            | ** ↓                                |
| Number of osteoclasts relative to TBI length   | * ↓                                             | NS                                  |
| <i>Micro-CT</i>                                |                                                 |                                     |
| Bone volume                                    | ** ↓                                            | *** ↓                               |
| <i>Radiography</i>                             |                                                 |                                     |
| Lesion area                                    | ** ↓                                            | * ↓                                 |

<sup>a</sup> Very strong osteoblastic component with ectopic bone growth Q4W, every four weeks; i.v., intravenous administration; NS, not significant; TBI, tumor-bone interface

Asterisks indicate statistical significance (\* p < 0.05, \*\* p < 0.01, \*\*\* p < 0.001)

Arrows indicate the direction of the change

**Supplementary Table S2.** Responses of radium-223 and abiraterone in LuCaP 58 prostate cancer PDX model in mice.

| <b>Parameter</b>                               | <b>Radium-223<br/>300 kBq/kg<br/>Q4W, i.v.</b> | <b>Abiraterone<br/>200 mg/kg<br/>QD, p.o.</b> |
|------------------------------------------------|------------------------------------------------|-----------------------------------------------|
| <i>Biochemical markers</i>                     |                                                |                                               |
| PSA                                            | NS                                             | NS                                            |
| PINP                                           | ** ↓                                           | NS                                            |
| <i>Histology</i>                               |                                                |                                               |
| Tumor area                                     | ** ↓                                           | NS                                            |
| Total tissue area                              | * ↓                                            | NS                                            |
| Tumor-bone interface                           | * ↓                                            | NS                                            |
| Total bone area                                | NS                                             | NS                                            |
| Relative trabecular bone area                  | NS                                             | NS                                            |
| Number of osteoblasts relative to bone surface | *** ↓                                          | NS                                            |
| Number of osteoclasts relative to TBI length   | ** ↓                                           | NS                                            |
| <i>Micro-CT</i>                                |                                                |                                               |
| Bone volume                                    | * ↓                                            | NS                                            |
| <i>Radiography</i>                             |                                                |                                               |
| Lesion area                                    | * ↓                                            | NS                                            |

Q4W, every four weeks; QD, once daily; i.v., intravenous administration; p.o., per os administration; NS, not significant; TBI, tumor-bone interface

Asterisks indicate statistical significance (\* p < 0.05, \*\* p < 0.01, \*\*\* p < 0.001)

Arrows indicate the direction of the change
